# Supplementary material
Source: PubMed Central journal article supplement (PMC3974243)
Supplement: 97320630010157S1.pdf [file 97320630010157S1.pdf]

## Supplementary material:

**Table 1:** Analysis of active site residues of JAK3 from co-crystal structures with inhibitors

| PDB ID | L828 | F833 | V836 | A853 | M902 | E903 | G908 | R953 | L956 | A966 | D967 | L905 |
|--------|------|------|------|------|------|------|------|------|------|------|------|------|
| 1YVJ   | N    | N    | HP   | N    | HP   | HB   | HP   | HB   | HP   | N    | HP   | HB   |
| 3LXK   | HP   | N    | HP   | HP   | N    | HB   | N    | N    | HP   | HP   | N    | HB   |
| 3LXL   | HP   | N    | HP   | HP   | N    | HB   | N    | N    | HP   | N    | N    | HB   |
| 3PJC   | HP   | HP   | HP   | N    | N    | HB   | N    | N    | HP   | N    | N    | HB   |
| 4HVD   | HP   | N    | N    | HP   | N    | HB   | N    | N    | HP   | N    | N    | HB   |
| 4HVG   | HP   | N    | N    | HP   | N    | HB   | N    | N    | HP   | N    | N    | HB   |
| 4HVI   | N    | N    | HP   | HP   | N    | HB   | N    | N    | HP   | N    | N    | HB   |
| 3ZC6   | HP   | N    | HP   | HP   | N    | HB   | HP   | N    | HP   | N    | N    | HB   |
| 4I6Q   | HP   | N    | N    | HP   | N    | HB   | N    | N    | HP   | N    | N    | HB   |

**Table 2:** Statistical Parameter of the 3D-QSAR AAHR.92

| PLS factor | SD     | R <sup>2</sup> | F     | P                     | RMSE   | q <sup>2</sup> | P-R    |
|------------|--------|----------------|-------|-----------------------|--------|----------------|--------|
| 1          | 0.8153 | 0.4188         | 62    | 9.622e <sup>-12</sup> | 0.8514 | 0.312          | 0.5656 |
| 2          | 0.6687 | 0.6135         | 67.5  | 2.83e <sup>-18</sup>  | 0.862  | 0.2947         | 0.5702 |
| 3          | 0.5649 | 0.7274         | 74.7  | 1.234e <sup>-23</sup> | 0.7327 | 0.4904         | 0.7146 |
| 4          | 0.4209 | 0.8505         | 118   | 2.046e <sup>-33</sup> | 0.7018 | 0.5325         | 0.7545 |
| 5          | 0.3588 | 0.8926         | 136.3 | 3.226e <sup>-38</sup> | 0.6529 | 0.5953         | 0.8164 |
| 6          | 0.2666 | 0.9422         | 162.5 | 5.186e <sup>-43</sup> | 0.6674 | 0.5772         | 0.7911 |
| 7          | 0.2342 | 0.9559         | 214.2 | 8.8e <sup>-47</sup>   | 0.6472 | 0.6023         | 0.8178 |

SD: standard deviation of the regression; F: variance ratio; P: significance level of variance ratio; RMSE: root mean square error; q<sup>2</sup>: squared value for the predicted activities; P R: Pearson R value for the correlation between predicted and observed activity for the test set; R<sup>2</sup>: squared value of the regression

**Table 3:** Molecular Docking Analysis of the Lead Compounds

| Lead                    | ZINC Database ID | XP Score | Glide Energy | Interacting Residues   | MBAE ΔE | RMSD  |
|-------------------------|------------------|----------|--------------|------------------------|---------|-------|
| Lead 1                  | ZINC72419848     | -12.96   | -72.20       | Glu903, Leu905, Tyr904 | -125.12 | 0.610 |
| Lead 2                  | ZINC72145366     | -12.94   | -72.97       | Glu903, Leu905, Tyr904 | -131.82 | 0.320 |
| Lead 3                  | ZINC08991673     | -12.81   | -71.11       | Glu903, Leu905,ASH967  | -125.29 | 0.53  |
| Lead 4                  | ZINC72162601     | -12.47   | -66.80       | Glu903, Leu905         | -105.36 | 0.602 |
| Lead 5                  | ZINC72157582     | -12.28   | -69.345      | Glu903, Leu905         | -81.278 | 0.554 |
| Lead 6                  | ZINC72418290     | -12.13   | -71.60       | Leu905,ASH967          | -80.78  | 0.610 |
| Lead 7                  | ZINC40757269     | -11.40   | -71.81       | Leu905,ASH967          | -116.22 | 0.571 |
| Lead 8                  | ZINC44963631     | -11.18   | -79.84       | Asn954, Lys855         | -157.68 | 0.39  |
| Lead 9                  | ZINC03280240     | -11.19   | -79.34       | -                      | -135.23 | 0.359 |
| Lead 10                 | ZINC63631329     | -11.18   | -63.48       | Leu905                 | -137.99 | 0.63  |
| CP-690550 (Tofacitinib) |                  | -9.86    | -92.23       | Glu903, Lys855         | -150.28 |       |

**Table 4:** (Available with authors)

**Table 5:** ADME properties of Lead Compounds

| Lead | QPlog Po/w <sup>a</sup> | QP logS <sup>b</sup> | QPlog HERG <sup>c</sup> | QPlog BB <sup>d</sup> | QPP MDCK <sup>e</sup> | % Human Oral Absorption <sup>f</sup> |
|------|-------------------------|----------------------|-------------------------|-----------------------|-----------------------|--------------------------------------|
| 1    | 0.94                    | -2.85                | -4.93                   | -1.79                 | 47.39                 | 69.27                                |
| 2    | 1.85                    | -3.53                | -5.17                   | -1.32                 | 175.39                | 84.03                                |
| 3    | 1.31                    | -3.71                | -5.19                   | -2.42                 | 30.50                 | 64.50                                |
| 4    | 2.37                    | -4.16                | -5.28                   | -1.22                 | 176.46                | 87.08                                |
| 5    | 2.52                    | -4.15                | -5.03                   | -1.24                 | 179.57                | 88.10                                |
| 6    | 1.45                    | -3.39                | -3.34                   | -2.30                 | 3.91                  | 52.57                                |
| 7    | 2.49                    | -3.95                | -6.18                   | -1.04                 | 448.43                | 94.52                                |
| 8    | 4.85                    | -5.9                 | -4.44                   | -0.29                 | 2536.76               | 100                                  |
| 9    | 2.28                    | -4.38                | -6.07                   | -1.57                 | 88.70                 | 81.66                                |
| 10   | 2.49                    | -3.95                | -6.18                   | -1.04                 | 448.43                | 94.59                                |

a) Predicted octanol/water partition co-efficient log P (acceptable range: -2.0 to 6.5); b), Predicted aqueous solubility; S in mol/L acceptable range: -6.5 to 0.5); c) Predicted IC50 value for blockage of HERG K<sup>+</sup> channels (acceptable range: below -6.0); d) Predicted Blood Brain Barrier permeability (acceptable range: -3 to 1.2); e) Predicted apparent MDCK cell permeability in nm/s; f) Percentage of human oral absorption (<25% is poor and >80% is high).
